# Supplementary material
Source: publisher figshare collection journal article supplement (https://gsajournals.figshare.com/articles/dataset/_/25979614)
Supplement: Supplementary file 1 [file 1]

## Table of Contents

|            | Lineage Name         | Dataset | Modality     |
|------------|----------------------|---------|--------------|
| Lineage 1  | N2_s1_emb1           | 9-Feb   | embGAN       |
| Lineage 2  | N2_s1_emb1_named     | 9-Feb   | embGAN       |
| Lineage 3  | N2_s2_emb1           | 9-Feb   | embGAN       |
| Lineage 4  | N2_s2_emb1_named     | 9-Feb   | embGAN       |
| Lineage 5  | N2_s3_emb1           | 9-Feb   | embGAN       |
| Lineage 6  | N2_s3_emb1_named     | 9-Feb   | embGAN       |
| Lineage 7  | N2_s4_emb1           | 9-Feb   | embGAN       |
| Lineage 8  | N2_s4_emb1_named     | 9-Feb   | embGAN       |
| Lineage 9  | N2_s6_emb1           | 9-Feb   | embGAN       |
| Lineage 10 | N2_s6_emb1_named     | 9-Feb   | embGAN       |
| Lineage 11 | N2_s7_emb1           | 9-Feb   | embGAN       |
| Lineage 12 | N2_s7_emb1_named     | 9-Feb   | embGAN       |
| Lineage 13 | N2_s7_emb2           | 9-Feb   | embGAN       |
| Lineage 14 | N2_s7_emb2_named     | 9-Feb   | embGAN       |
| Lineage 15 | N2_s1_emb1           | 10-Feb  | embGAN       |
| Lineage 16 | N2_s1_emb1_named     | 10-Feb  | embGAN       |
| Lineage 17 | N2_s2_emb1           | 10-Feb  | embGAN       |
| Lineage 18 | N2_s2_emb1_named     | 10-Feb  | embGAN       |
| Lineage 19 | N2_s3_emb1           | 10-Feb  | embGAN       |
| Lineage 20 | N2_s3_emb1_named     | 10-Feb  | embGAN       |
| Lineage 21 | N2_CSUN              | CSUN    | embGAN       |
| Lineage 22 | N2_CSUN_Named        | CSUN    | embGAN       |
| Lineage 23 | JIM113_s1_emb2_named | 16-Aug  | embGAN       |
| Lineage 24 | JIM113_s1_emb3_named | 16-Aug  | embGAN       |
| Lineage 25 | JIM113_s2_emb1_named | 16-Aug  | embGAN       |
| Lineage 26 | JIM113_s2_emb3_named | 16-Aug  | embGAN       |
| Lineage 27 | JIM113_s1_emb2       | 16-Aug  | Flourescence |
| Lineage 28 | JIM113_s1_emb2_named | 16-Aug  | Flourescence |
| Lineage 29 | JIM113_s1_emb3       | 16-Aug  | Flourescence |
| Lineage 30 | JIM113_s1_emb3_named | 16-Aug  | Flourescence |
| Lineage 31 | JIM113_s2_emb1       | 16-Aug  | Flourescence |
| Lineage 32 | JIM113_s2_emb1_named | 16-Aug  | Flourescence |
| Lineage 33 | JIM113_s2_emb3       | 16-Aug  | Flourescence |
| Lineage 34 | JIM113_s2_emb3_named | 16-Aug  | Flourescence |
| Lineage 35 | JIM113_s1_emb2       | 4-Aug   | Flourescence |
| Lineage 36 | JIM113_s2_emb1       | 4-Aug   | Flourescence |
| Lineage 37 | JIM113_s2_emb2       | 4-Aug   | Flourescence |
| Lineage 38 | JIM113_s2_emb3       | 4-Aug   | Flourescence |
| Lineage 39 | JIM113_s3_emb1       | 4-Aug   | Flourescence |

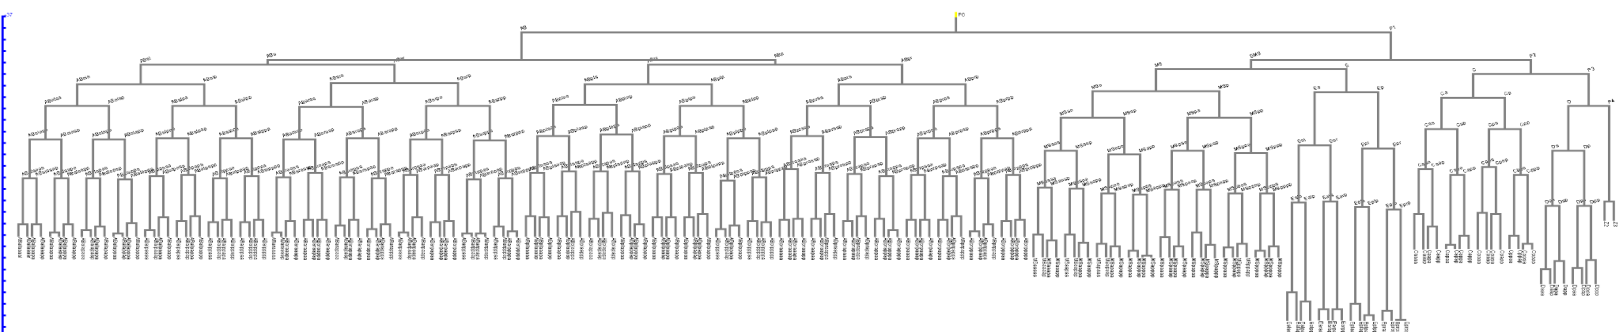

Figure 1: Edited lineage of N2\_s1\_emb1\_020923 using embGAN generated images

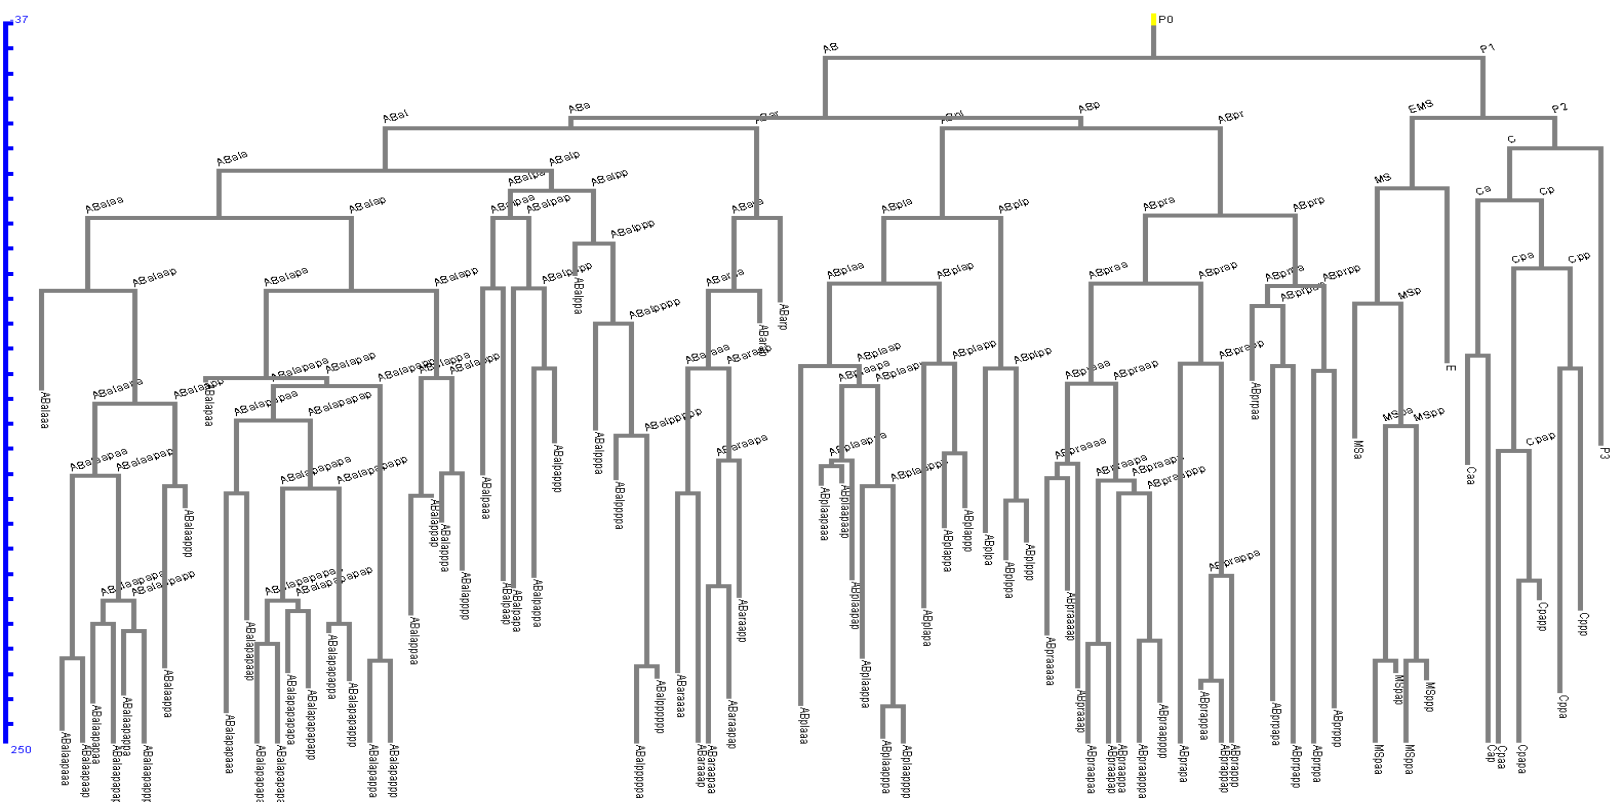

Figure 2: Lineage of N2\_s1\_emb1\_020923 edited only until the 8 cell stage using embGAN generated images

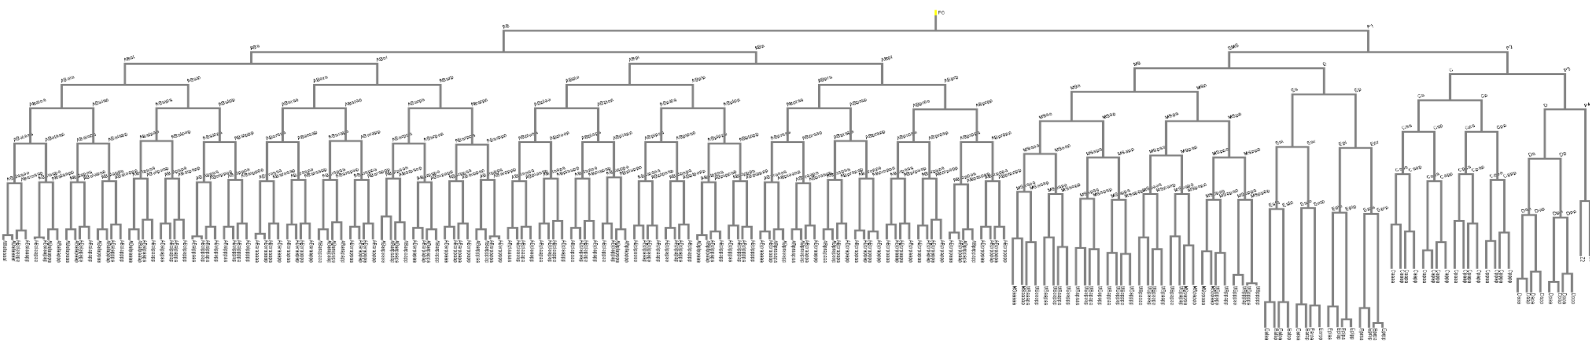

Figure 3: Edited lineage of N2\_s2\_emb1\_020923 using embGAN generated images

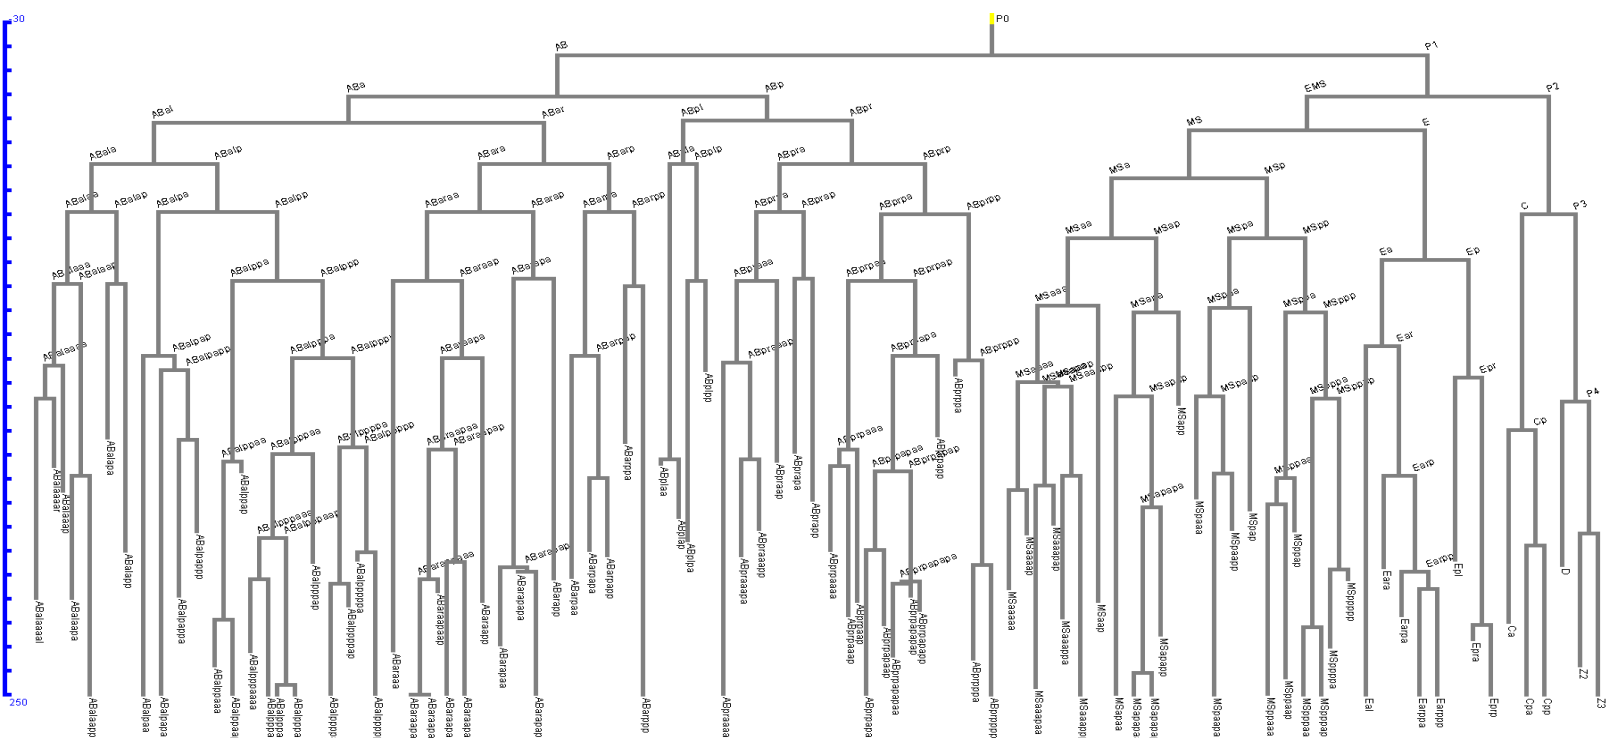

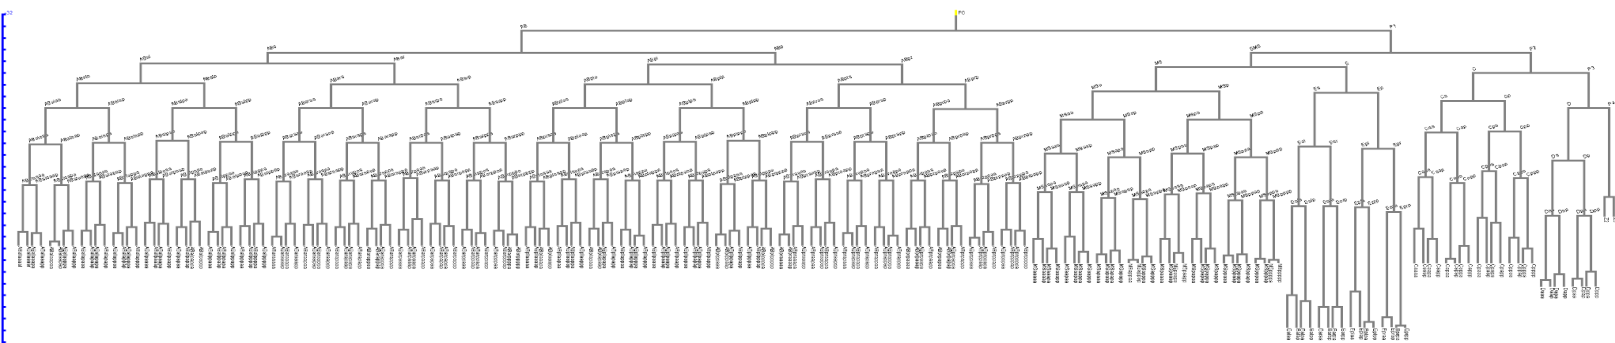

Figure 5: Edited lineage of N2\_s3\_emb1\_020923 using embGAN generated images

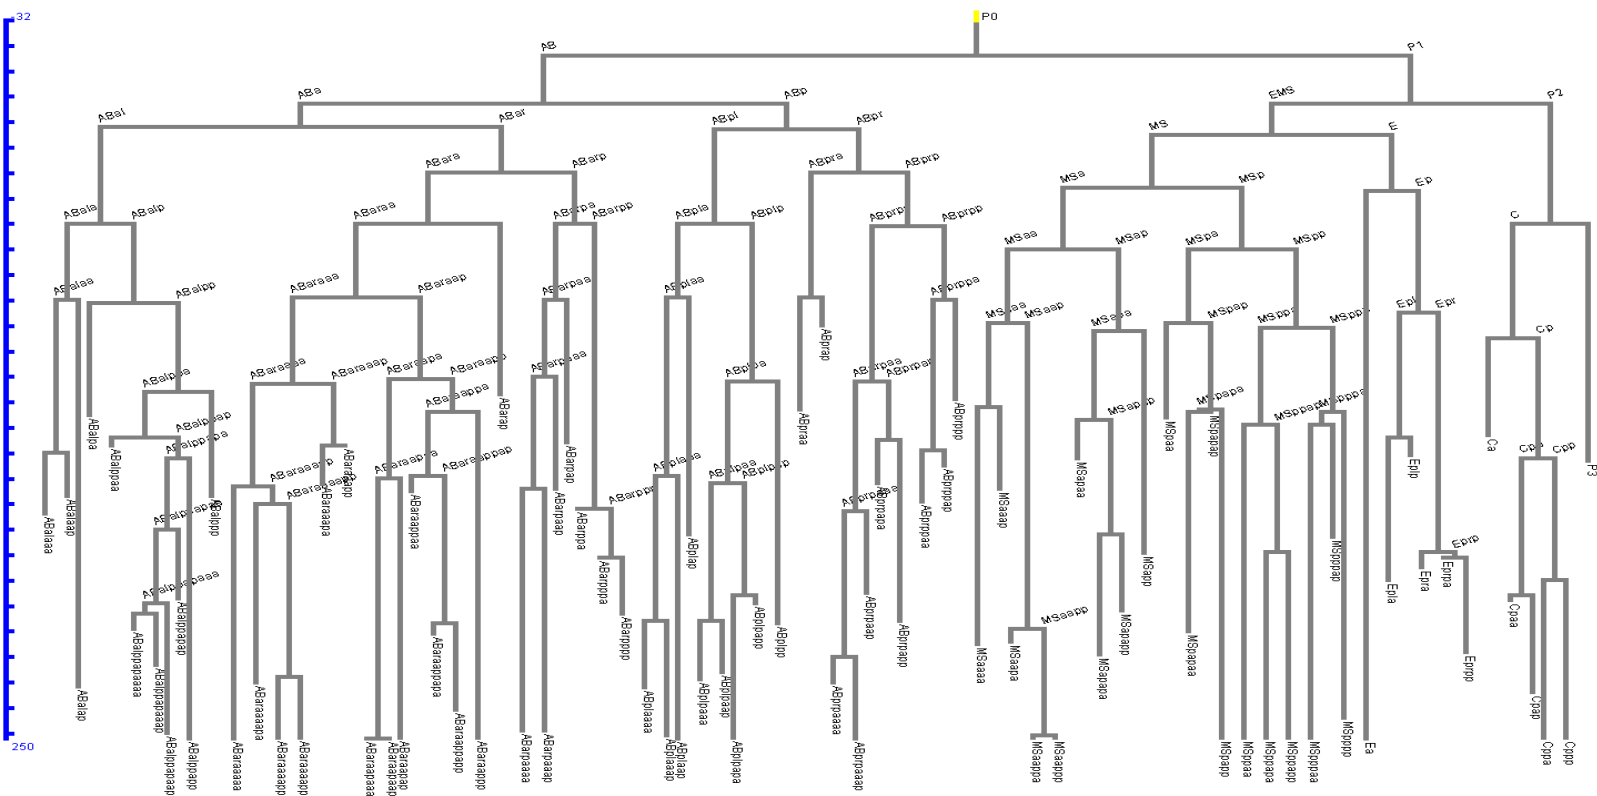

Figure 6: Lineage of N2\_s3\_emb1\_020923 edited only until the 8 cell stage using embGAN generated images

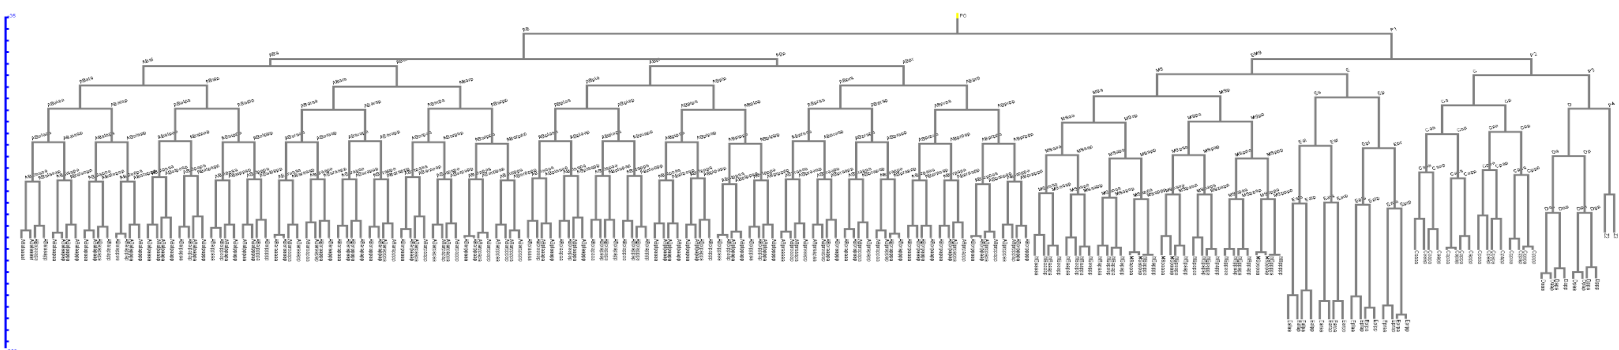

Figure 7: Edited lineage of N2\_s4\_emb1\_020923 using embGAN generated images



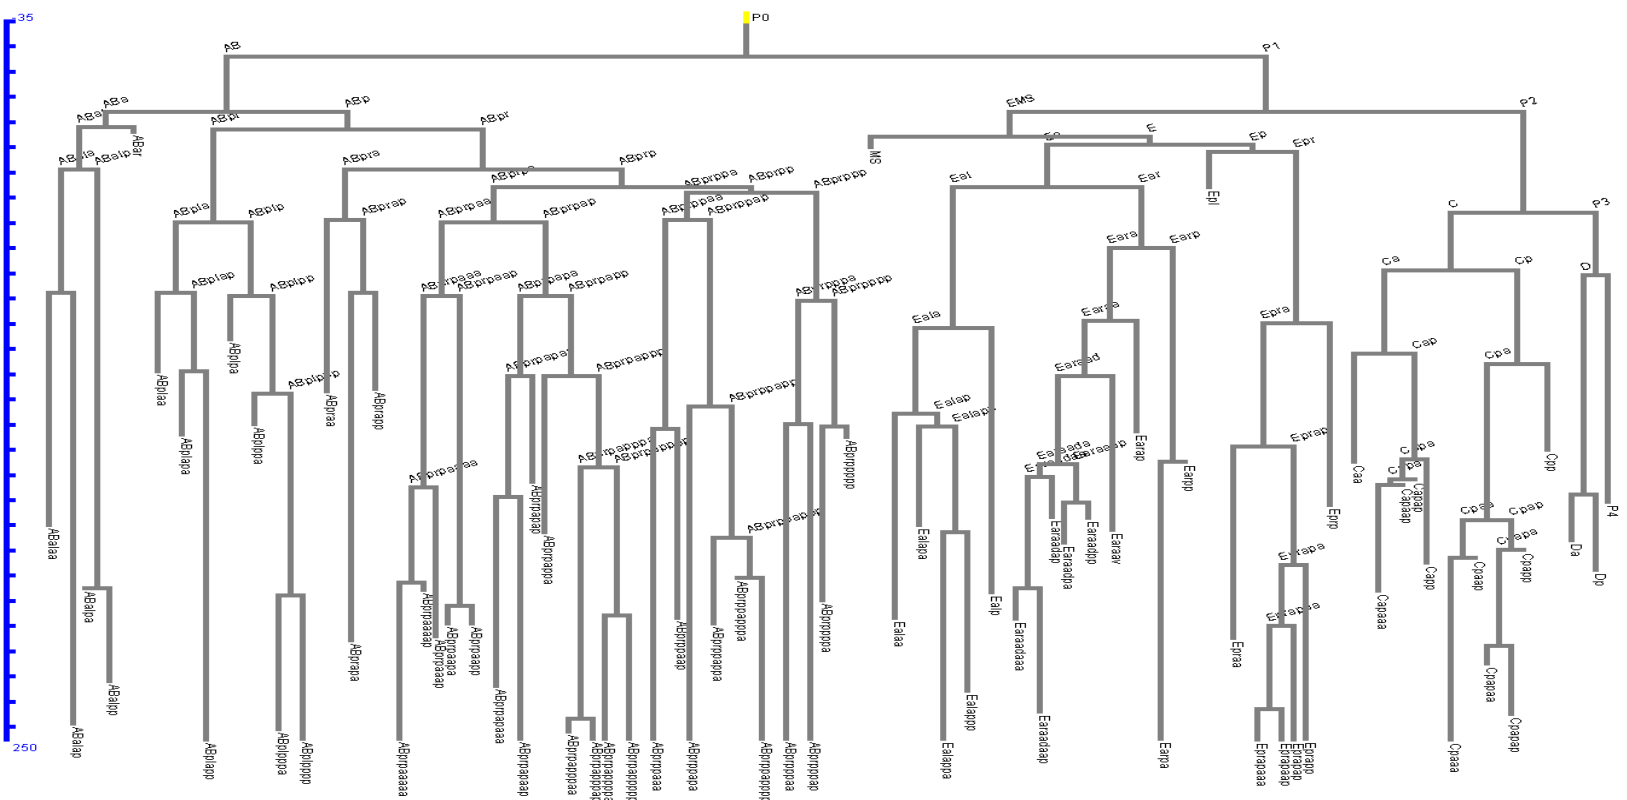

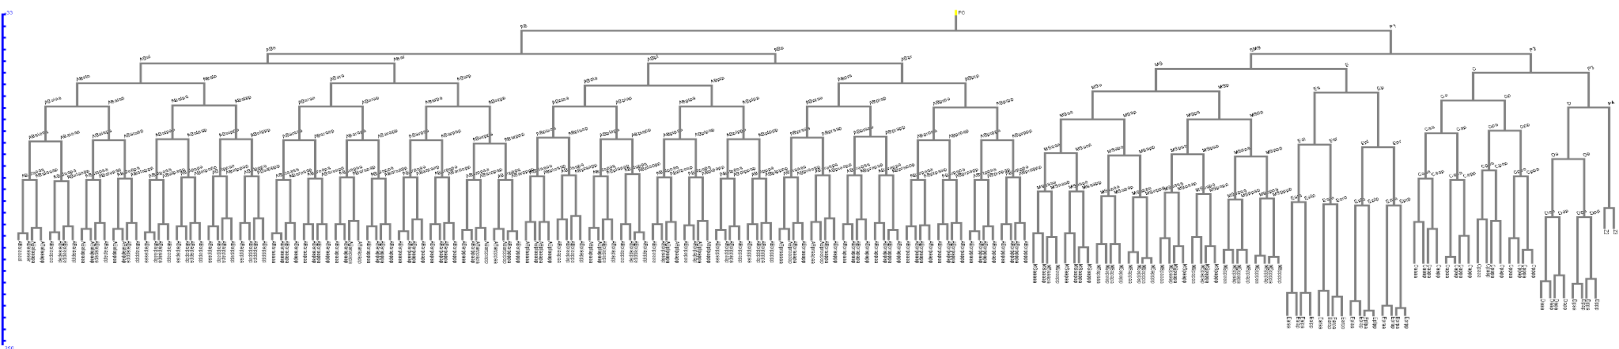

Lineage 9: Edited lineage of N2\_s6\_emb1\_020923 using embGAN generated images

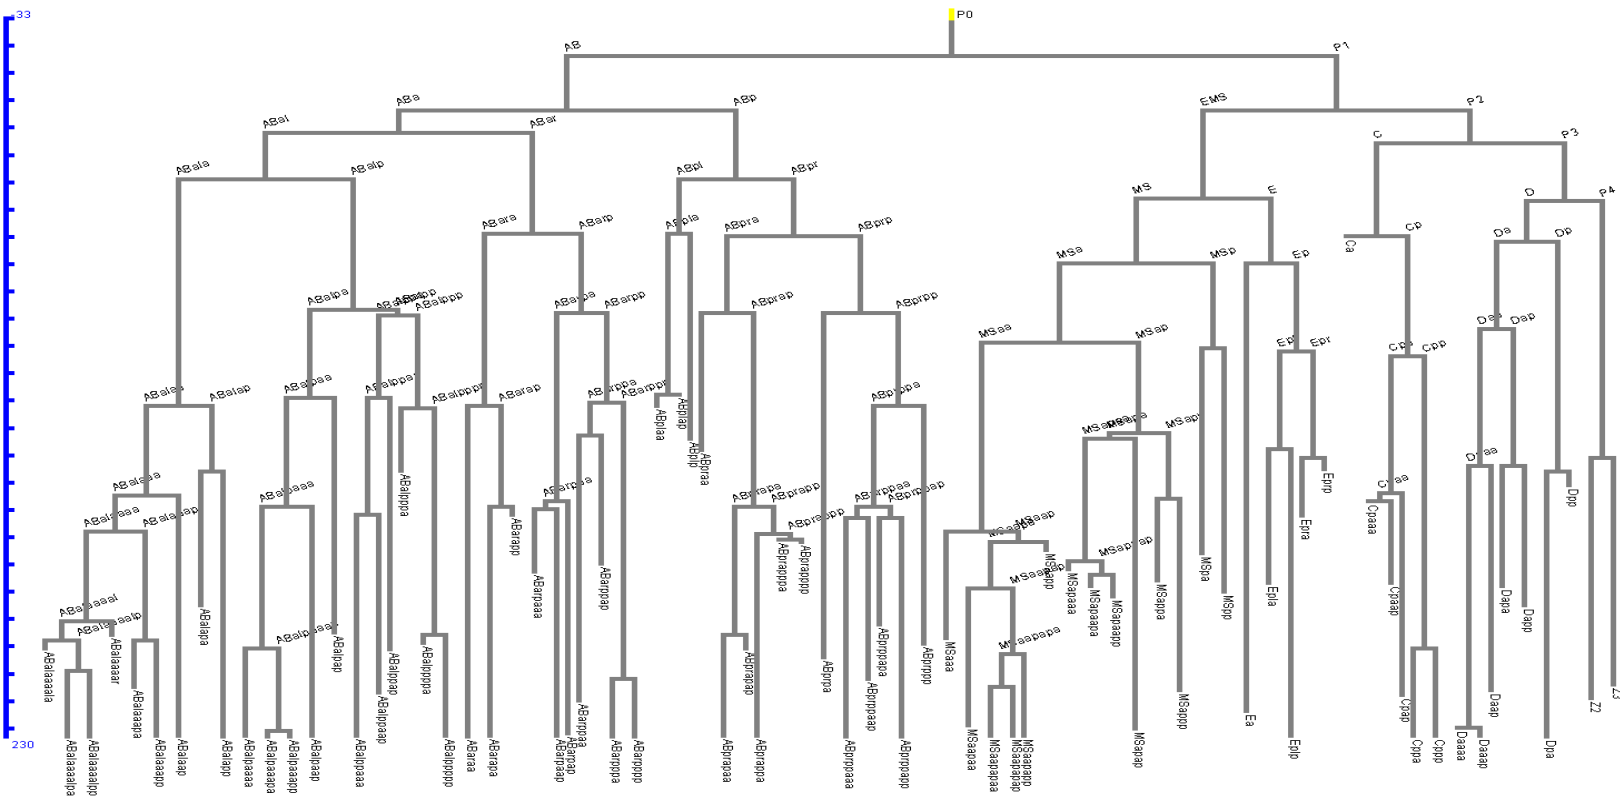

Figure 10: Lineage of N2\_s6\_emb1\_020923 edited only until the 8 cell stage using embGAN generated images

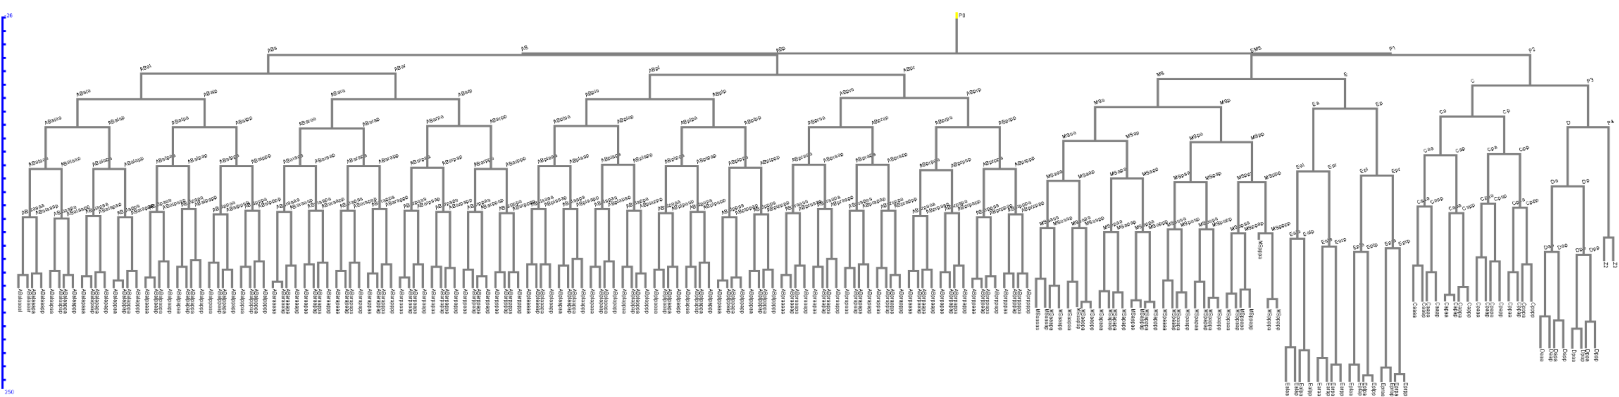

Figure 11: Edited lineage of N2\_s7\_emb1\_020923 using embGAN generated images



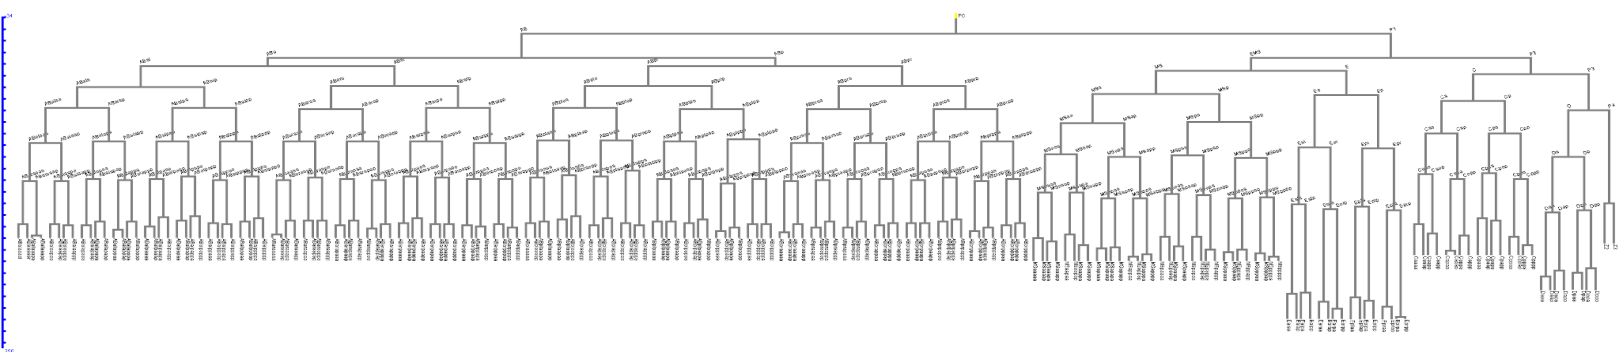

Figure 13: Edited lineage of N2\_s7\_emb1\_020923 edited using embGAN generated images









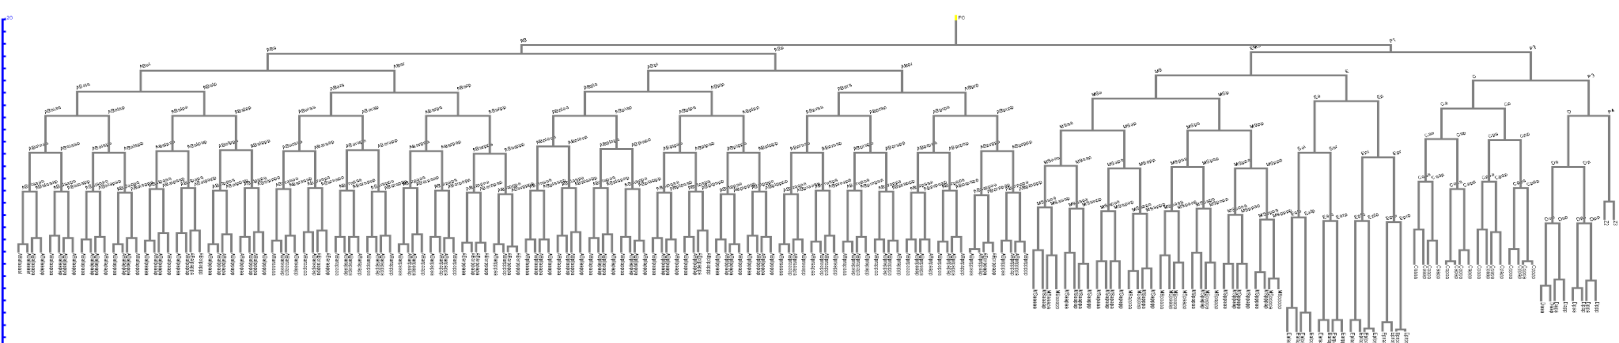

Figure 17: Edited lineage of N2\_s2\_emb1\_021023 using embGAN generated images



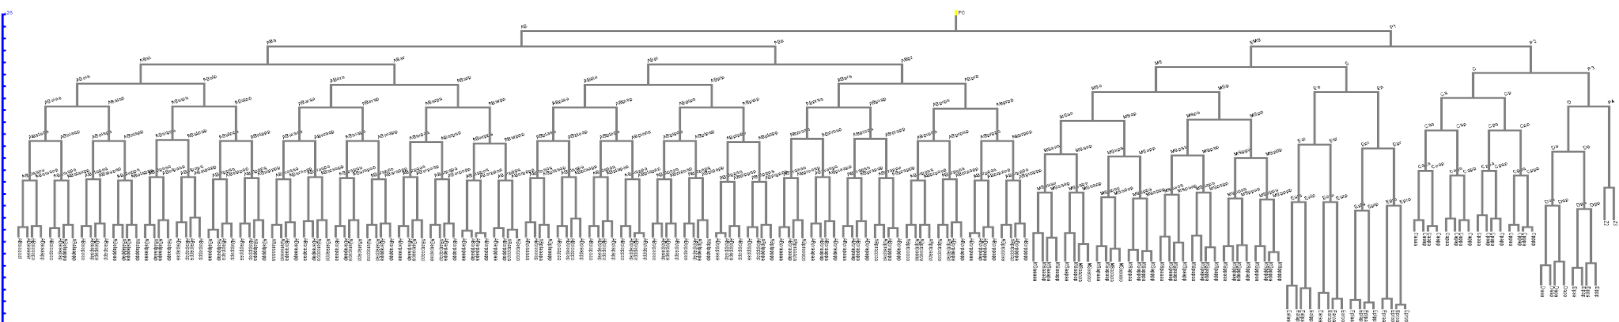

Figure 19: Edited lineage of N2\_s3\_emb1\_021023 using embGAN generated images

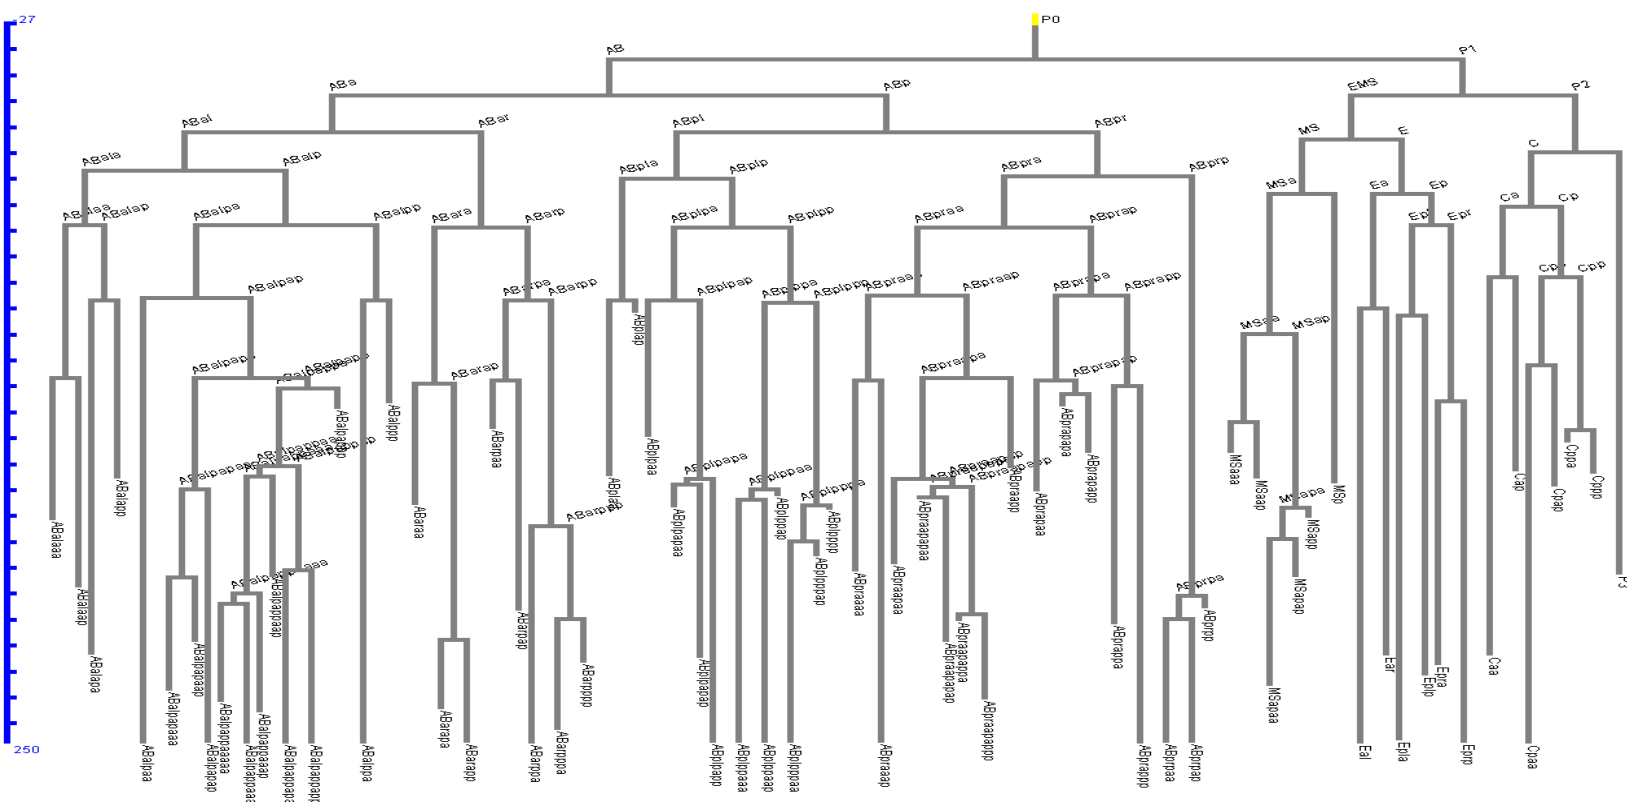

Figure 20: Lineage of N2\_s3\_emb1\_021023 edited only until the 8 cell stage using embGAN generated images



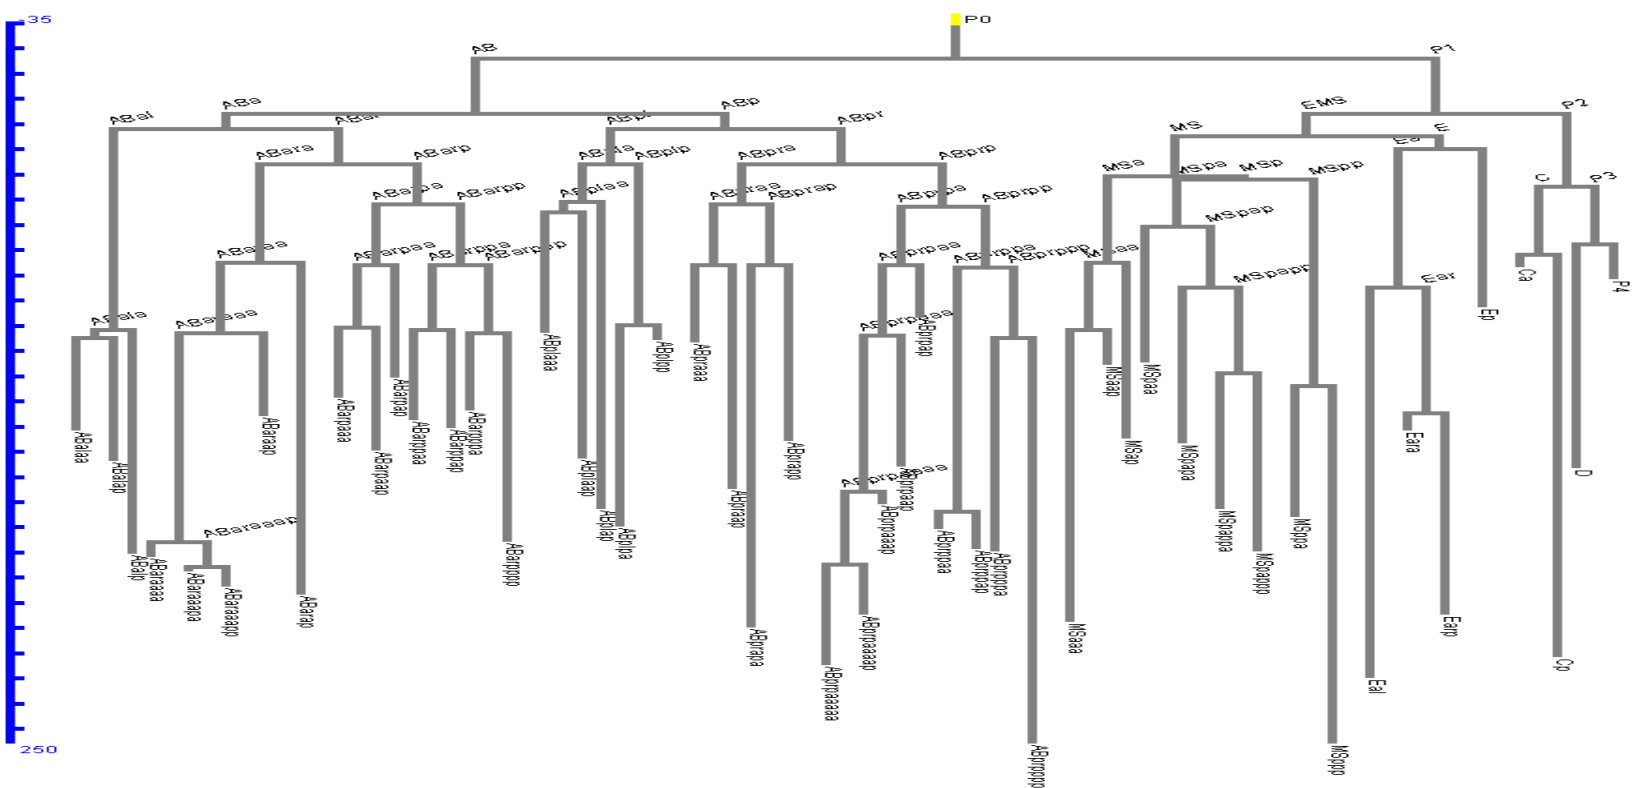

Figure 22: Lineage of N2\_s1\_emb1\_CSUN edited only until the 8 cell stage using embGAN generated images

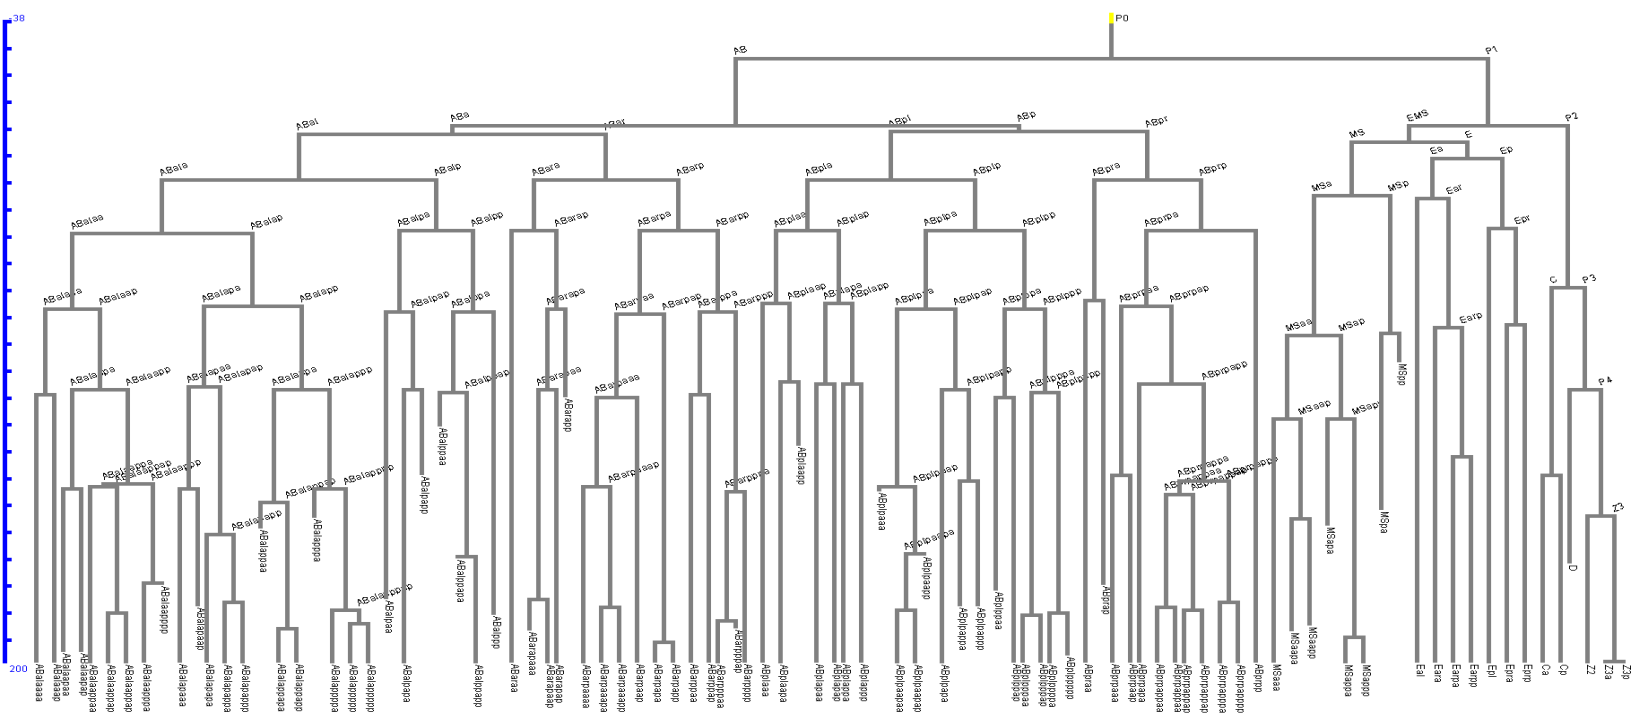

Figure 23: Lineage of JIM113\_s1\_emb2\_081623 edited only until the 8 cell stage using embGAN generated images



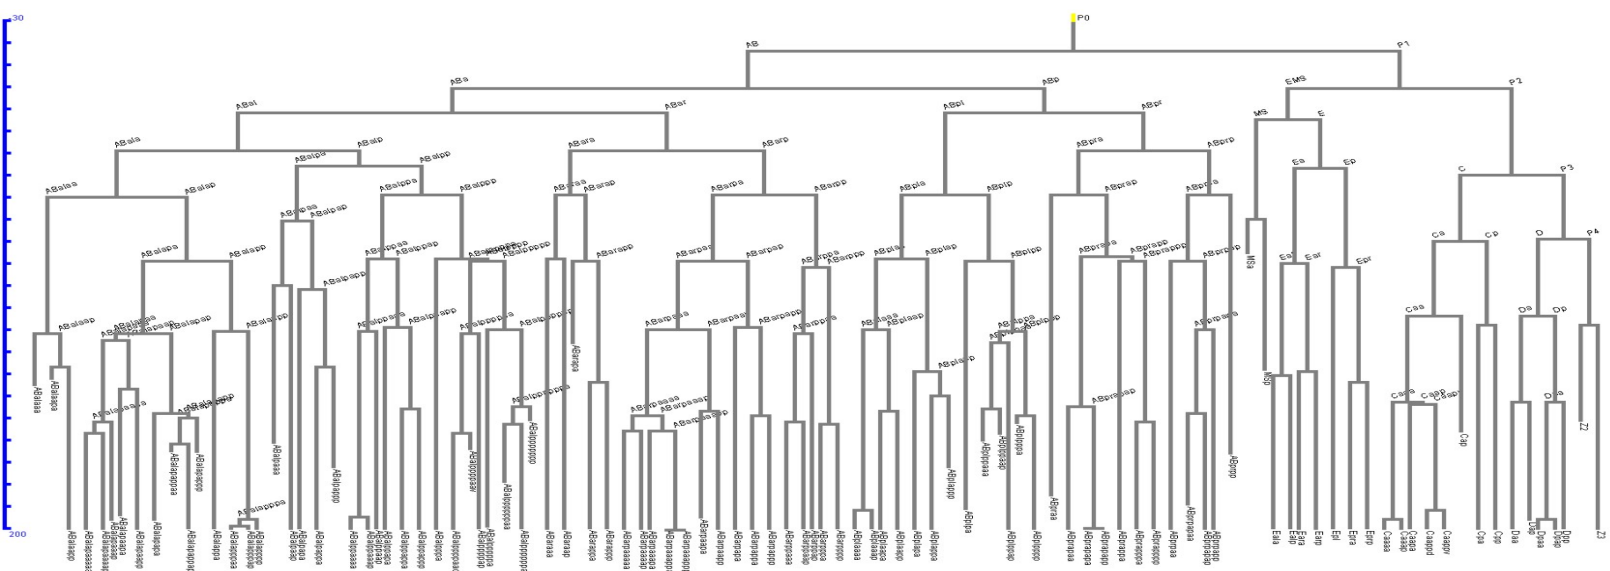

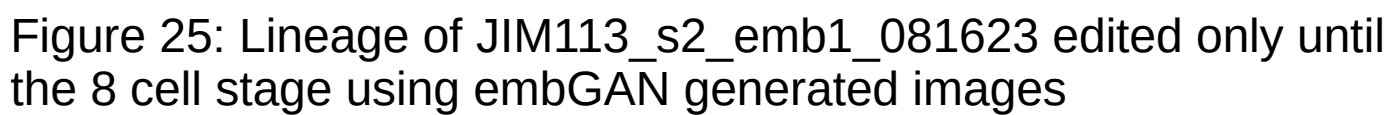



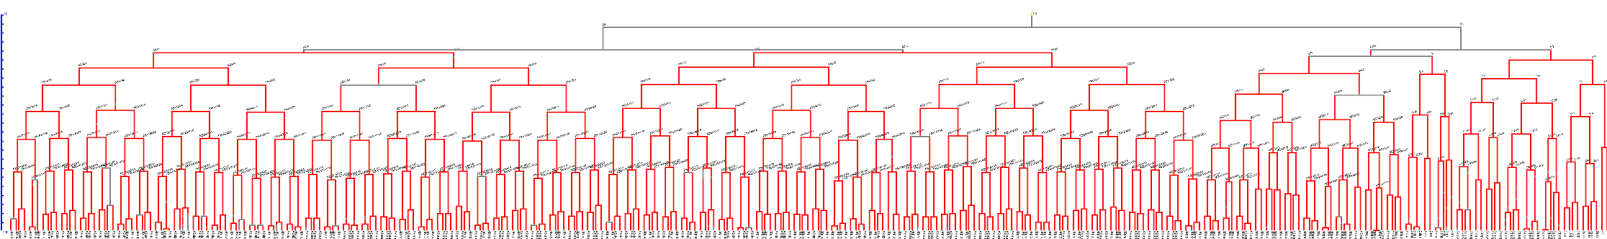

Figure 27: Edited lineage of JIM113\_s1\_emb2\_081623 using fluorescence images

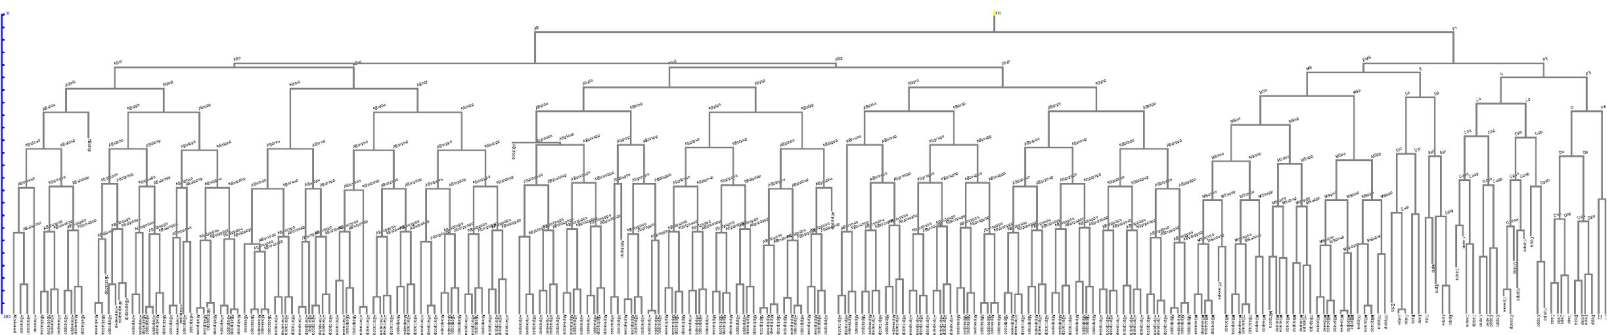

Figure 28: Edited lineage of JIM113\_s1\_emb2\_081623 using fluorescence images

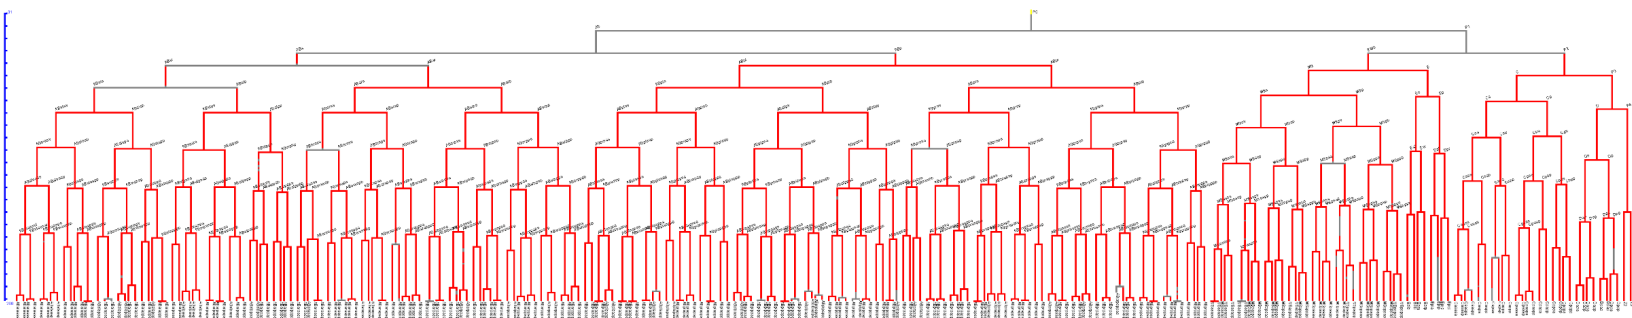

Figure 29: Edited lineage of JIM113\_s1\_emb3\_081623 using fluorescence images



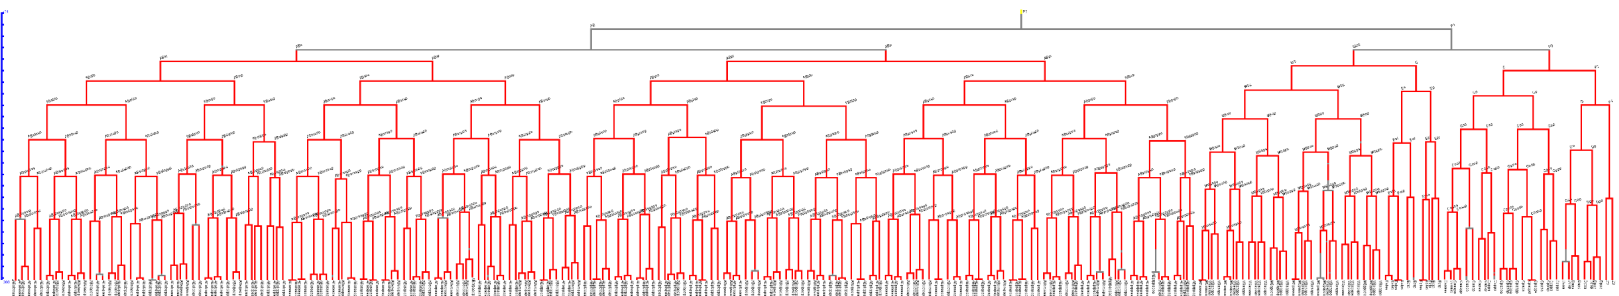

Figure 31: Edited lineage of JIM113\_s2\_emb1\_081623 using fluorescence images





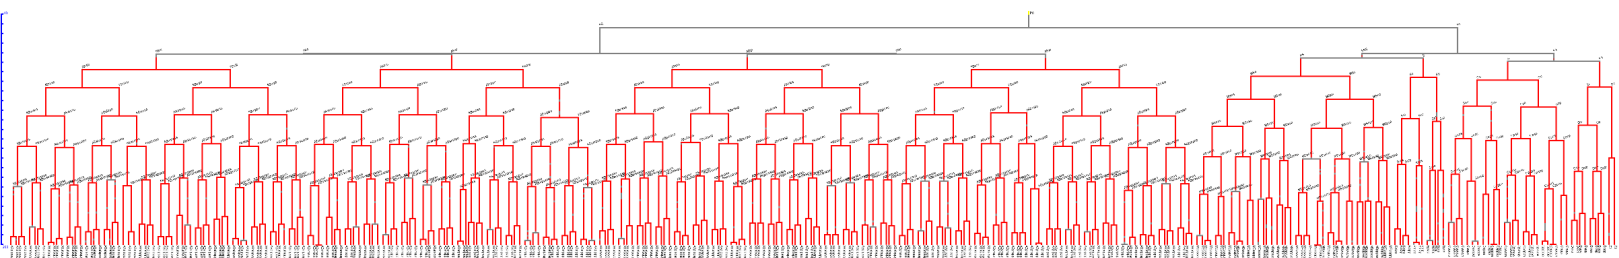

Figure 33: Edited lineage of JIM113\_s2\_emb3\_081623 using fluorescence images



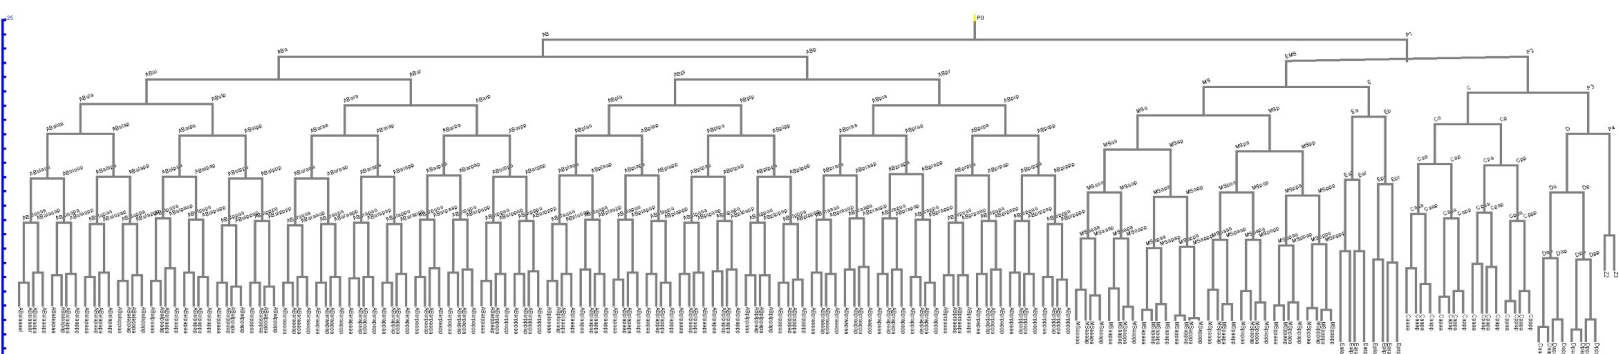

Figure 35: Edited lineage of JIM113\_s1\_emb2\_080423 using fluorescence images

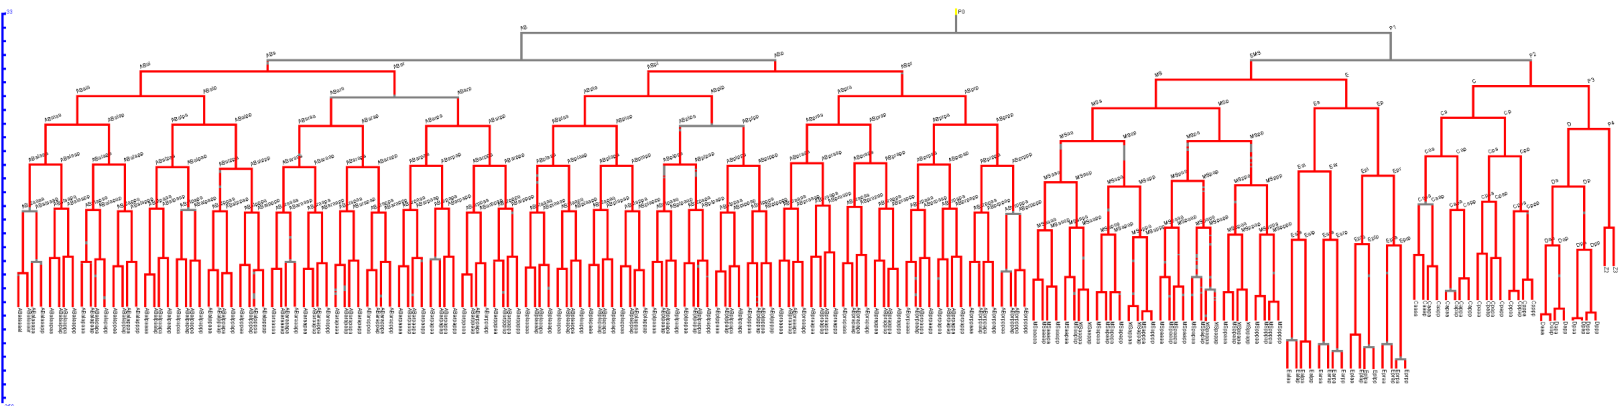

Figure 36: Edited lineage of JIM113\_s2\_emb1\_080423 using fluorescence images

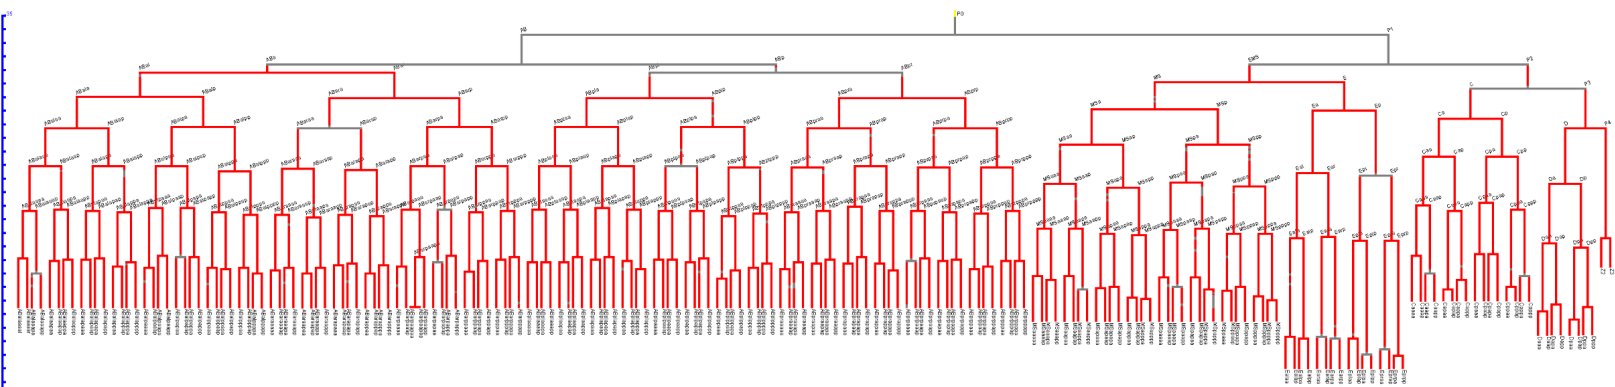

Figure 37: Edited lineage of JIM113\_s2\_emb2\_080423 using fluorescence images

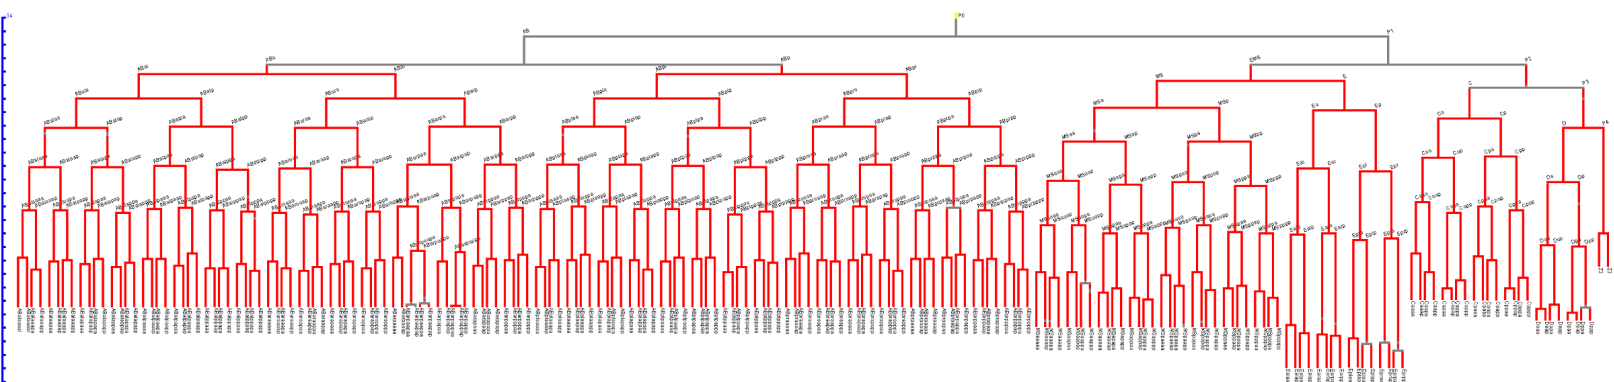

Figure 38: Edited lineage of JIM113\_s2\_emb3\_080423 using fluorescence images

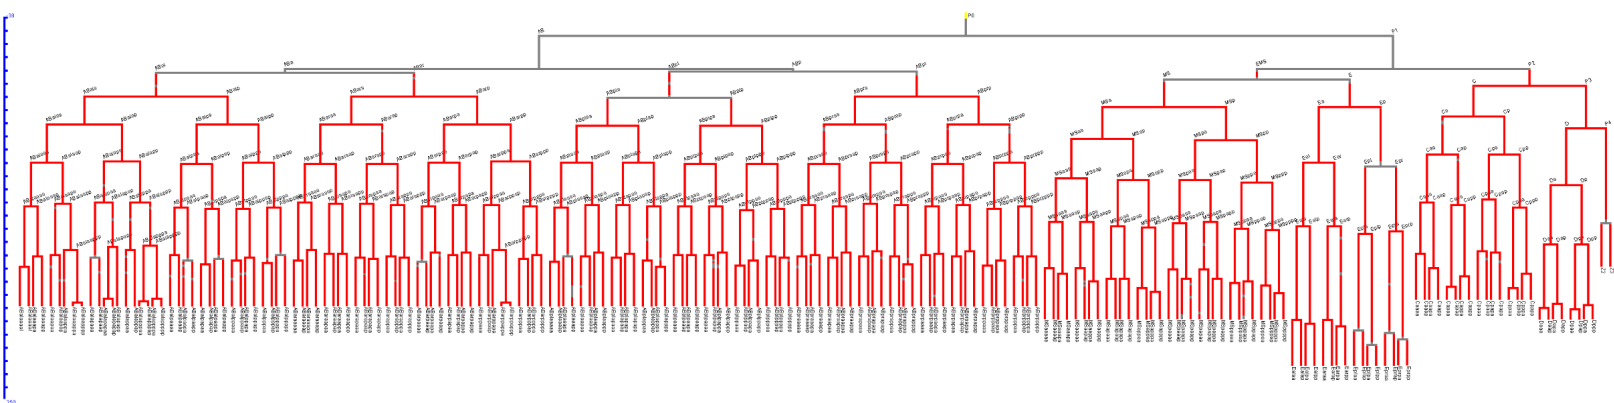

Figure 39: Edited lineage of JIM113\_s3\_emb1\_080423 using fluorescence images
